# Supplementary material for: The Transnational Patriot
Source: Atypon-hosted journal article supplement (doi:10.1027/1016-9040/a000416), 2021-01-01
Supplement: 1016-9040_a000416_esm1.pdf [file 1016-9040_a000416_esm1.pdf]

## Electronic Supplementary Material 1. Data Details

| Speaker           | Nationality    | Political Party                                  | Duration<br>(min:sec) | Language<br>Spoken   | English<br>Translation | Video<br>Source   |
|-------------------|----------------|--------------------------------------------------|-----------------------|----------------------|------------------------|-------------------|
| Markus Pretzell   | German         | Alternative for Germany (AfD)                    | 20:03                 | German               | Spoken                 | AfD-TV            |
| Marine Le Pen     | French         | Front National (FN)                              | 22:19                 | French               | Subtitles              | VladTepesblog.com |
| Geert Wilders     | Dutch          | Partij voor de Vrijheid (VVD; Party for Freedom) | 23:00                 | German               | Subtitles              | PVV.NL            |
| Matteo Salvini    | Italian        | Lega Nord (Northern League)                      | 14:04                 | Italian <sup>1</sup> | Subtitles              | VladTepesblog.com |
| Harald Vilimsky   | Austrian       | Freedom Party of Austria (FPÖ)                   | 13:26                 | German               | Spoken                 | AfD-TV            |
| Frauke Petry      | German         | AfD                                              | 25:11                 | German               | Spoken                 | AfD-TV            |
| Tom Van Grieken   | Belgian        | Vlaams Belang (VB; Flemish Interest)             | 2:02                  | English              | -                      | AfD-TV            |
| Gerolf Annemans   | Belgian        | VB                                               | 12:27                 | German               | <sup>2</sup>           | AfD-TV            |
| Janice Atkinson   | British        | Independent <sup>3</sup>                         | 8:20                  | English              | -                      | AfD-TV            |
| Tomio Okamura     | Czech Republic | Freedom and Direct Democracy (SPD)               | 4:27                  | English              | -                      | AfD-TV            |
| Laurentiu Rebeaga | Romanian       | Independent                                      | 7:56                  | English              | -                      | AfD-TV            |

*Notes:* 1. Matteo Salvini opened with English before switching to Italian. 2. No publicly available English translation, therefore Gerolf Annemans was dropped from the analysis. 3. Janice Atkinson was expelled from the UK Independence Party (UKIP).
